# Supplementary material for: QTL Mapping and Functional Identification of Candidate Genes Regulated by Sinorhizobium fredii HH103 and Associated with Nodulation Traits in Soybean
Source: MDPI journal article supplement (doi:10.3390/agronomy13082037), 2023-07-31
Supplement: s1 [file s1]

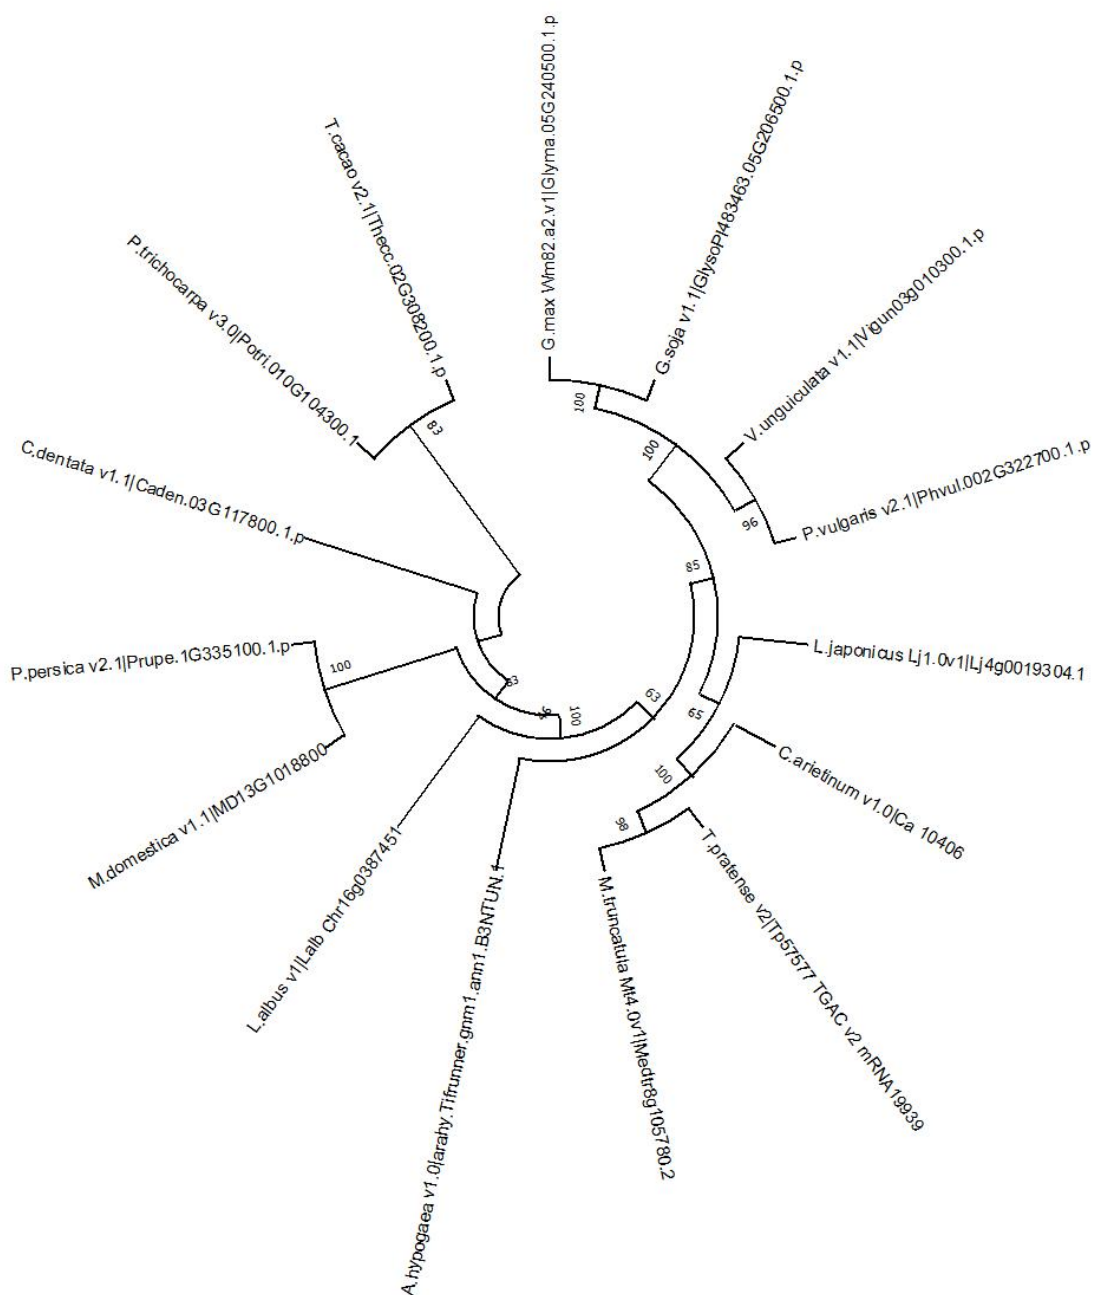

Figure S1 Phylogenetic analysis of the candidate gene using the corresponding gene from different plants (including *Glycine max*, *Glycine soja*, *Vigna unguiculata*, *Phaseolus vulgaris*, *Lotus japonicus*, *Cicer arretinum*, *Trifolium pratense*, *Medicago truncatula*, *Arachis hypogaea*, *Lupinus albus*, *Malus domestica*, *Castanea dentata*, *Prunus persica*, *Populus trichocarpa*, and *Theobroma cacao*).

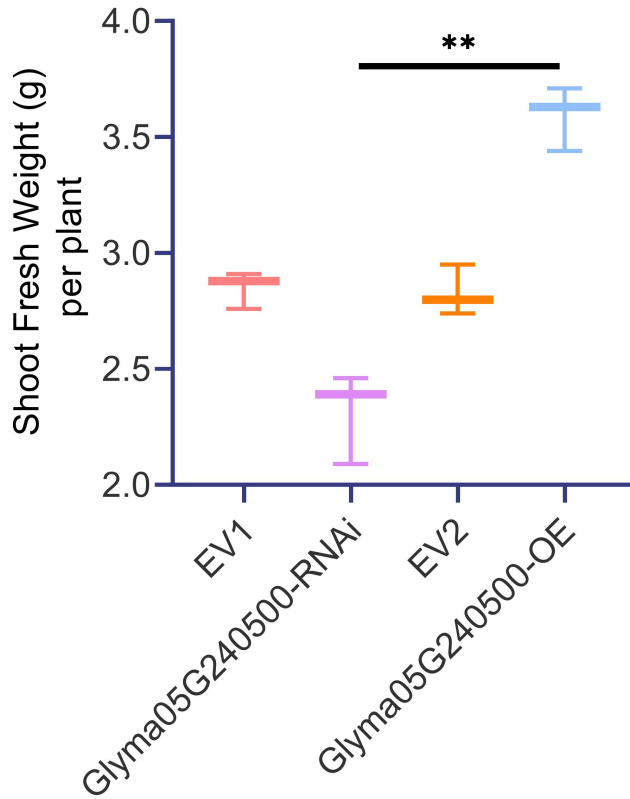

Figure S2 Boxplots of SFW of hairy roots transformed with EV1, *Glyma.05G240500-RNAi*, EV2, and *Glyma.05G240500-OE* after inoculation with HH103 (28 dpi).
