# Supplementary material for: QTL Mapping and Functional Identification of Candidate Genes Regulated by Sinorhizobium fredii HH103 and Associated with Nodulation Traits in Soybean
Source: MDPI journal article supplement (doi:10.3390/agronomy13082037), 2023-07-31
Supplement: s1 [file s1]

**Table S1. Information of Strains and Vectors**

| <b>Strain</b>                  | <b>Relevant characteristics</b>                                                              | <b>Reference</b>                                  |
|--------------------------------|----------------------------------------------------------------------------------------------|---------------------------------------------------|
| <i><b>Escherichia coli</b></i> |                                                                                              |                                                   |
| DH5α                           | supE44 lacY169 ( 80lacZM15) hsdR17 recA1 endA1 gyrA96 thi-1 relA1                            | Transgene (Transgene Biotech Co., Beijing, China) |
| <i><b>A. tumefaciens</b></i>   |                                                                                              |                                                   |
| EHA105                         | C58 (rif <sup>R</sup> ) Ti pEHA105 (pTiBo542DT-DNA) (strep <sup>R</sup> ) Succinamopine      | Transgene (Transgene Biotech Co., Beijing, China) |
| K599                           | Agrobacterium rhizogenes (strR) pRi2659 (agropine type)                                      | Transgene (Transgene Biotech Co., Beijing, China) |
| <i><b>Rhizobium</b></i>        |                                                                                              |                                                   |
| <b>strains</b>                 |                                                                                              |                                                   |
| HH103                          | Broad host range bacterium isolated from nodules of Glycine max , Rif <sup>r</sup>           | This work                                         |
| <b>Plasmids</b>                |                                                                                              |                                                   |
| pGWC                           | Entry clone vector, Cm <sup>r</sup>                                                          | Chen et al. [1]                                   |
| pGWB5                          | Binary expression vector, Km <sup>r</sup>                                                    | Nakagawa et al. [2]                               |
| pB7GWIWG2(II)                  | RNA interference silencing vector used for directed mutagenesis (Gm <sup>r</sup> )           | Quandt and Hynes. [3]                             |
| pSoy1                          | plant binary vector used to study the influence of gene over-expression (Spec <sup>r</sup> ) | Schmidhuber, S.[4]                                |

References cited in Table S1

- [1] Q. Chen, H. Zhou, J. Chen, X. Wang, Using a modified TA cloning method to create entry clones, Analytical biochemistry. 358.1 (2006), 120-125.
- [2] Tsuyoshi, N., K. Takayuki, H. Takeshi, T. Katsunori, K. Makoto, N. Yasuo, et al. 2007. Development of series of gateway binary vectors, pGWBs, for realizing efficient construction of fusion genes for plant transformation. J. Biosci. Bioeng. 104: 34-41.
- [3] Mansour, K., I. Dirk and D. Ann. 2002. GATEWAY™ vectors for Agrobacterium-mediated plant transformation. Trends Plant Sci. 7: 193-195.
- [4] Schmidhuber, S., Ludwig, W., Schleifer, K. H. (1988). Construction of a DNA probe for the specific identification of Streptococcus oralis. J.Clin.Microbiol. 26 : 1042-1044 .

**Table S2 Primers for this research**

| primers                  | sequence                                             | primers   | sequence             |
|--------------------------|------------------------------------------------------|-----------|----------------------|
| Glyma.05G244200-qRTPCR-F | TTTGCTCCTCTGCACTA                                    | GmNSP1-qF | ACCACAACACCCCTTGAGAC |
| Glyma.05G244200-qRTPCR-R | CATGCACTCTTTATGCCTTC                                 | GmNSP1-qR | GTTGTTGTCCCTTCTGCGTG |
| Glyma.05G240500-qRTPCR-F | GGTGAAATCTTCCGGTTC                                   | GmNIN-qF  | ATGCAAGGCGCATAACTTGC |
| Glyma.05G240500-qRTPCR-R | GAAATAGGTAGGAAGAAGTG                                 | GmNIN-qR  | AAGGTGACACTCAGAGCACG |
| GmNSP2-qF                | TCTCCATCACGGAGGAGGAC                                 | GmActin-F | GGTGGTTCTATCTTGGCATC |
| GmNSP2-qR                | TGGGACGACACCAACTCCTT                                 | GmActin-R | CTTTCGCTTCAATAACCCTA |
| 240500-PGWC-F            | agcaggccttgactttaggtcATGGTGAAATCTTCCGGTTCGG          |           |                      |
| 240500-PGWC-R            | tgggtctagagactttaggtcgTATTCTCGAGTTTCTCCATCTCTATGATCA |           |                      |
